# Supplementary material
Source: publisher figshare collection journal article supplement (https://acs.figshare.com/ndownloader/files/23950394)
Supplement: Supplementary file 1 [file 23950394]

# Cobalt Metal–Organic Frameworks Incorporating Redox-Active Tetrathiafulvalene Ligand: Structures and Effect of LLCT within MOF on Photoelectrochemical Properties

Miao Jiang, Yi-Gang Weng, Zi-Yao Zhou, Chen-Yi Ge, Qin-Yu Zhu,\* and Jie Dai\*  
College of Chemistry, Chemical Engineering and Materials Science, Soochow University, Suzhou 215123, P. R. China

## 1. Characterizations and measurements

## 2. Figures

**Figure S1.** The experimental powder XRD patterns and the simulated pattern from the crystal data of compounds **1–3**.

**Figure S2.** 1D Co4–Co5–Co6 chain structure bridged by carboxylate groups of L in **1**.

**Figure S3.** 2D network of **1** indicating the arrangement of the six cobalt ions linked by carboxylate groups of L and bpe. Hydrogen atoms and ligand L except those related coordination atoms are omitted for clarity.

**Figure S4.** The sketch maps of the planes of parts of bpe and L in **1**.

**Figure S5.** Structures of Co<sub>5</sub> clusters in this work and previously reports.

**Figure S6.** Stick representation of the cluster chain in **2** along the *a* axis showing that TTF is located evenly in the four directions of the chain. bpe is omitted except the coordinated nitrogen atoms for clarity.

**Figure S7.** A part of the packing diagram of **2** showing the  $\pi\cdots\pi$  interactions between the TTF moiety and bpe molecule.

**Figure S8.** (a) An infinite –Co–O–C–O–Co– 1-D chain along the *b* axis constructed by carboxylate bridges of **3**. bpa except the coordinated nitrogen atoms and all hydrogen atoms are omitted for clarity; (b) 2-D network structure of **3**. L except the coordinated carboxylate groups and all hydrogen atoms are omitted for clarity.

**Figure S9.** Solid-state ESR spectra of **1** and **2** recorded at 120 K.

**Figure S10.** (a) CV curves of **1** at different scan rates. (b) The integrated area of the CV curves and the specific capacitances of **1** at different scan rates. (c) GCD curves of **1** at different current intensities. (d) Variation of specific capacitance of **1** with

applied currents.

**Figure S11.** (a) CV curves of **2** at different scan rates. (b) The integrated area of the CV curves and the specific capacitances of **2** at different scan rates. (c) GCD curves of **2** at different current intensities. (d) Variation of specific capacitance of **2** with applied currents.

**Figure S12.** Curves of the peak currents vs the square roots of scan rates of **1**, **2**, and **3** for CV measurements.

**Figure S13.** The specific capacitances of **1**, **2**, and **3** at different scan rates.

### 3. Tables

**Table S1.** The mean deviations from the planes of the TTF moiety and bpe, the dihedral angles and the distances between least-squares planes in **1** and **2**.

**Table S2.** Comparison of Csp values of various Co-MOF materials.

**Table S3.** Crystal data and structural refinement parameters for compounds **1–3**.

### 4. Equations

## 1. Characterizations and Measurements

### General Remarks.

The sodium salt of dimethylthio-tetrathiafulvalene-bicarboxylate ( $\text{Na}_2\text{L}$ ) was prepared according to the literature.<sup>1</sup> All analytically pure reagents were purchased commercially and used without further purification. Elemental analyses (C, H, and N) were performed using a VARIDEL III elemental analyzer. Solid-state room-temperature optical diffuse reflectance spectra of the microcrystal samples were obtained with a Shimadzu UV-2600 spectrophotometer using  $\text{BaSO}_4$  as a standard reference. Powder X-ray diffraction (PXRD) data were obtained using a D/MAX-3C X-ray diffraction meter with  $\text{CuK}\alpha$  ( $\lambda = 1.5406 \text{ \AA}$ ) radiation. Cyclic voltammetry (CV) experiments were performed on a CHI650 electrochemistry workstation in a three-electrode system with a Pt plate working electrode, a saturated calomel electrode (SCE) as reference electrode, and Pt wire as the auxiliary electrode. Electron spin resonance (ESR) spectra were carried out at 120 K and obtained using a Bruker ER-420 spectrometer with a 100 kHz magnetic field in X band.

### X-ray Crystallographic Study.

The crystal data were collected on a Bruker APEX-II CCD diffractometer for **1** and a Rigaku Mercury CCD diffractometer for **2** and **3** equipped with graphite monochromated  $\text{Mo K}\alpha$  ( $\lambda = 0.71075 \text{ \AA}$ ) radiation were used to carry out the measurements at 223 K. An absorption correction (multiscan) was applied for all these compounds. The structures were solved by direct methods using SHELXS-16 program and the refinements were performed against  $F^2$  using SHELXL-16.<sup>2</sup> Detailed crystal data and structural refinement parameters are listed in Table S3 in the Supporting Information.

### Electrode Preparation and Photocurrent Measurement.

The photoelectrodes of the compounds were prepared by powder coating method. As a typical procedure, the crystals of compounds (0.005 mmol) were ground and pressed uniformly on the ITO glass ( $1.0 \times 1.0 \text{ cm}$ ,  $8 \text{ }\Omega/\square$ ). A 150 W high-pressure xenon lamp, located 20 cm away from the surface of the ITO electrode, was employed

as a full-wavelength light source. The photocurrent experiments were performed at room temperature on a CHI660E electrochemistry workstation in a three-electrode system, with the sample coated ITO glass as the working electrode mounted on the window with an area of 0.50 cm<sup>2</sup>, a Pt wire as auxiliary electrode and a saturated calomel electrode (SCE) as reference electrode. The supporting electrolyte solution was a 0.1 mol·L<sup>-1</sup> sodium sulfate aqueous solution. The lamp was kept on continuously, and a manual shutter was used to block exposure of the sample to the light. The sample was typically irradiated at intervals of 20 s.

#### **Fabrication of the working electrodes and electrochemical measurements.**

The working electrodes were obtained with the following procedure. The compounds as active materials, acetylene black, and a poly(vinylene fluoride) (PVDF) emulsion, were mixed in ethanol at a weight ratio of 75 : 15 : 10, and dispersed by ultrasonic treatment for 10 min. The slurry was coated on a nickel foam (1.0 × 1.0 cm<sup>2</sup>) current collector and then pressed and dried under vacuum at 60 °C for 12 h. The mass of the active loading on the nickel foam was ~3 mg. The electrochemical properties of the active material were tested using a CHI660E electrochemical workstation by a conventional three-electrode system with a calomel reference electrode and a platinum counter electrode. The average specific capacitances of the electrodes were calculated based on the CV curves and the discharge curves, respectively. All of the electrochemical measurements were performed in a 6.0 M KOH solution at room temperature.

#### References

- (1) (a) McCullough, R. D.; Petruska, M. A.; Belot, J. A. *Tetrahedron* **1999**, *55*, 9979–9998. (b) Hudhomme, P.; Moustarder, S. L.; Durand, C.; Gallego-Planas, N.; Mercier, N.; Blanchard, P.; Levillain, E.; Allain, M.; Gorgues, A.; Riou, A. *Chem. Eur. J.* **2001**, *7*, 5070–5083.

(2) (a) Sheldrick, G. M. *SHELXS-97*, Program for structure solution; Universität of Göttingen, Göttingen, Germany, **1999**. (b) Sheldrick, G. M. Crystal structure refinement with SHELXL. *Acta Crystallogr., Sect. C: Struct. Chem.* **2015**, *71*, 3–8.

## 2. Figures

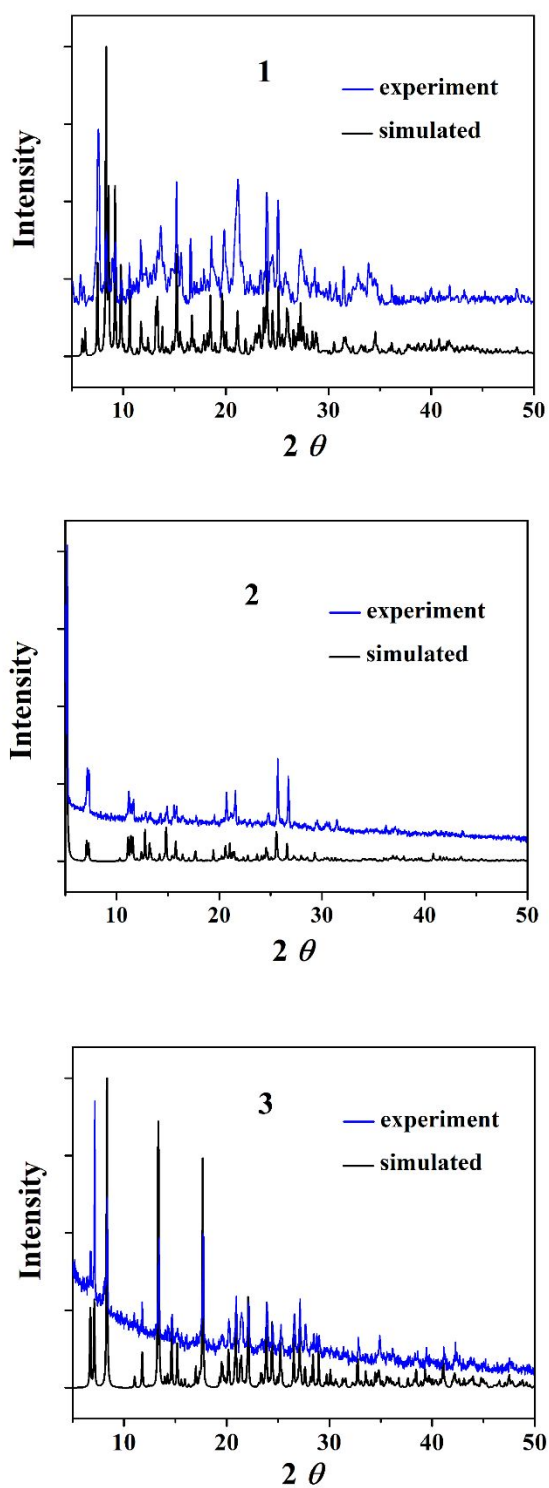

**Figure S1.** The experimental powder XRD patterns and the simulated pattern from the crystal data of compounds **1–3**.

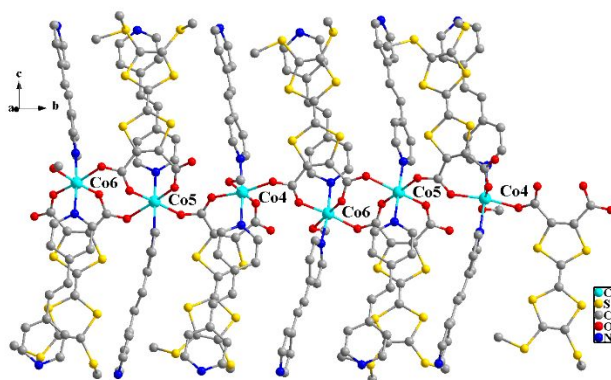

**Figure S2.** 1D Co4–Co5–Co6 chain structure bridged by carboxylate groups of **L** in **1**.

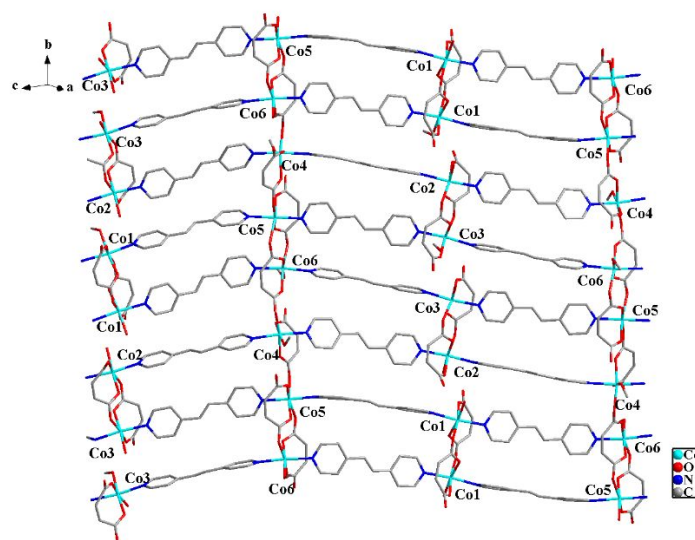

**Figure S3.** 2D network of **1** indicating the arrangement of the six cobalt ions linked by carboxylate groups of **L** and bpe. Hydrogen atoms and ligand **L** except those related coordination atoms are omitted for clarity.

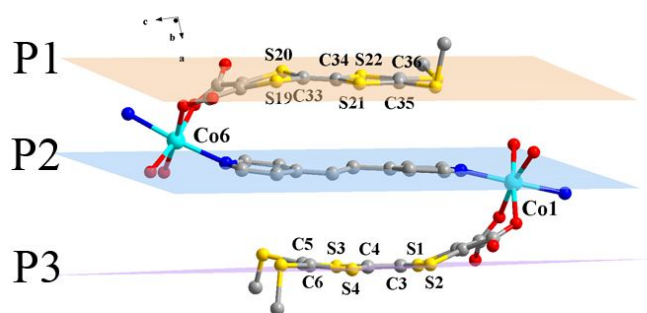

(a)

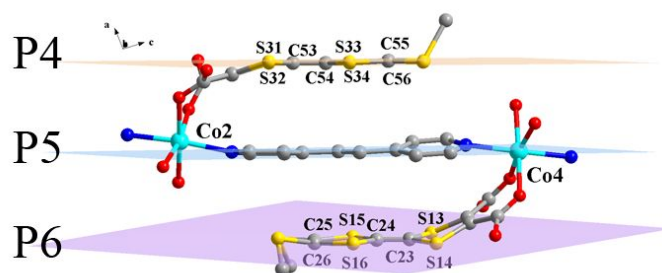

(b)

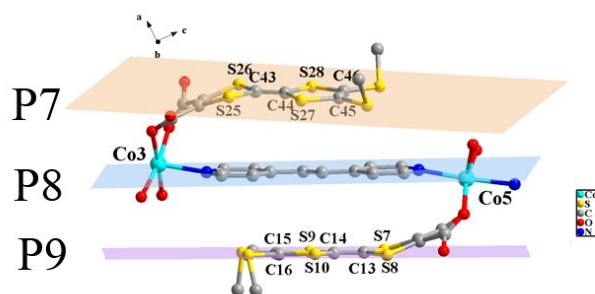

(c)

**Figure S4.** The sketch maps of the planes of parts of L and bpe in **1**.



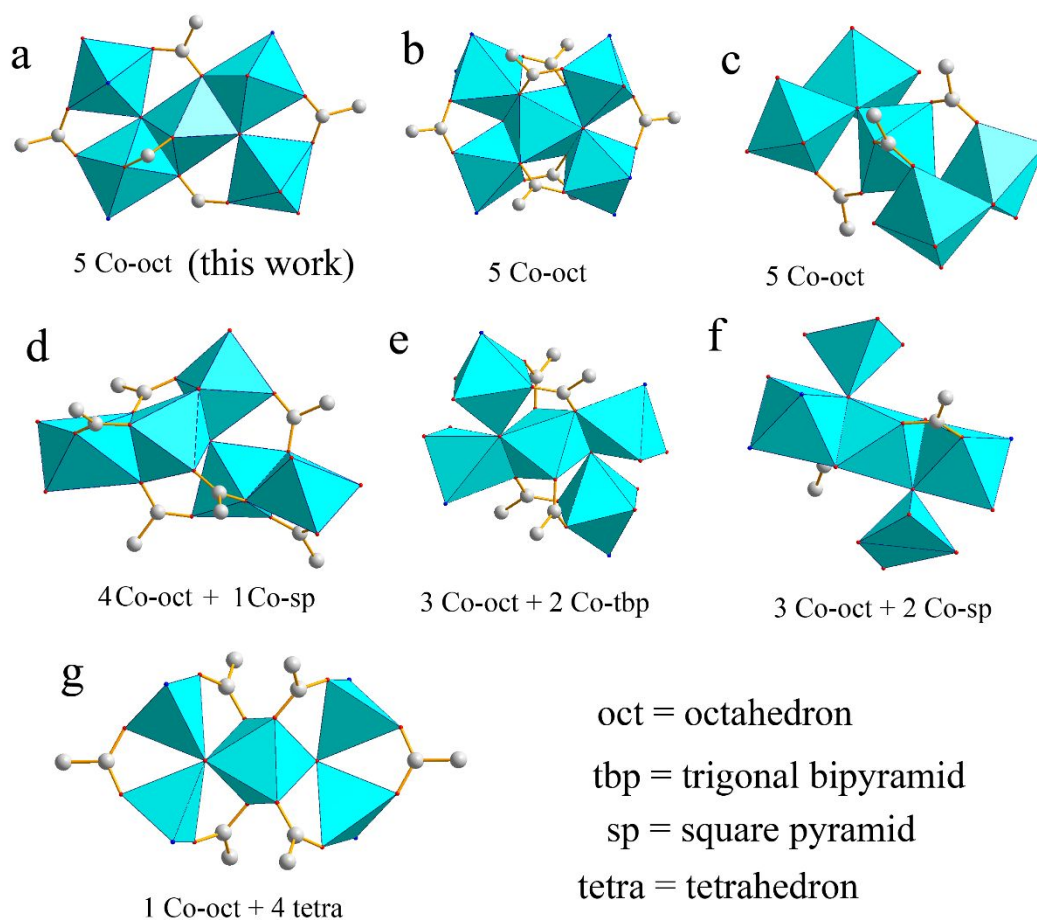

**Figure S5.** Structures of Co<sub>5</sub> clusters in this work and previously reports.

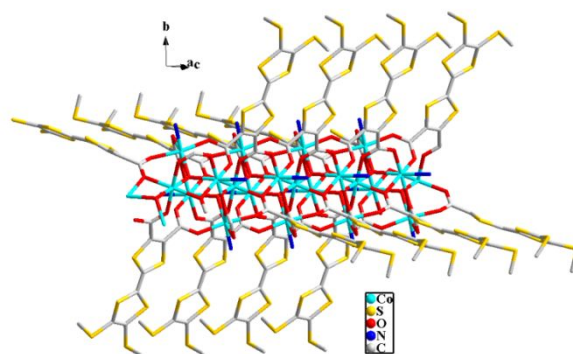

**Figure S6.** Stick representation of the cluster chain in **2** along the *a* axis showing that TTF is located evenly in the four directions of the chain. bpe is omitted except the coordinated nitrogen atoms for clarity.

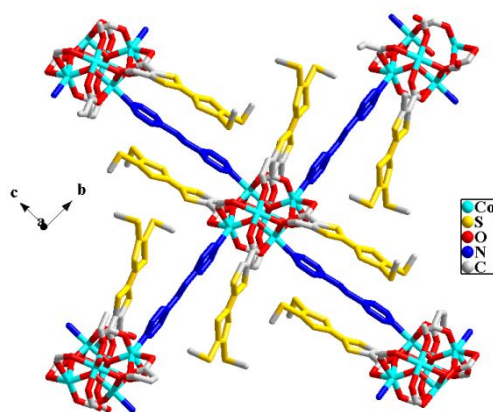

**Figure S7.** A part of the packing diagram of **2** showing the  $\pi\cdots\pi$  interactions between the TTF moiety and bpe molecule.

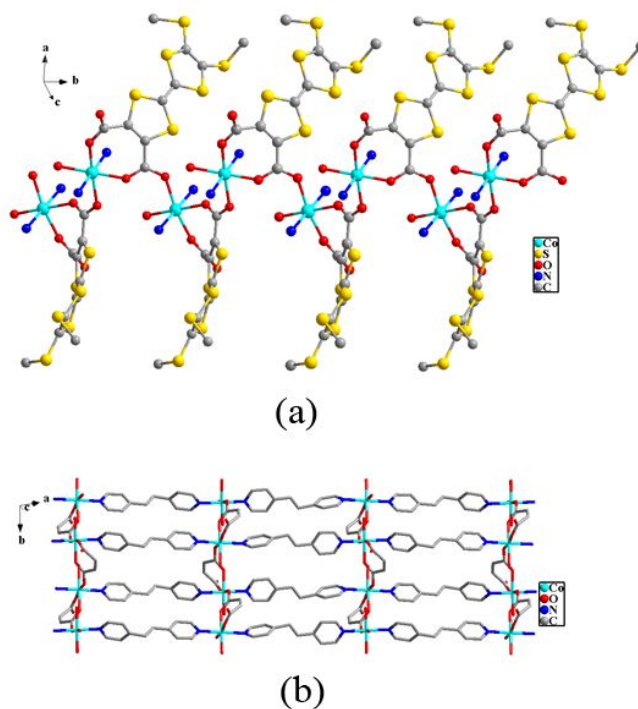

**Figure S8.** (a) An infinite  $-\text{Co}-\text{O}-\text{C}-\text{O}-\text{Co}-$  1-D chain along the  $b$  axis constructed by carboxylate bridges of **3**. bpa except the coordinated nitrogen atoms and all hydrogen atoms are omitted for clarity; (b) 2-D network structure of **3**. L except the coordinated carboxylate groups and all hydrogen atoms are omitted for clarity.

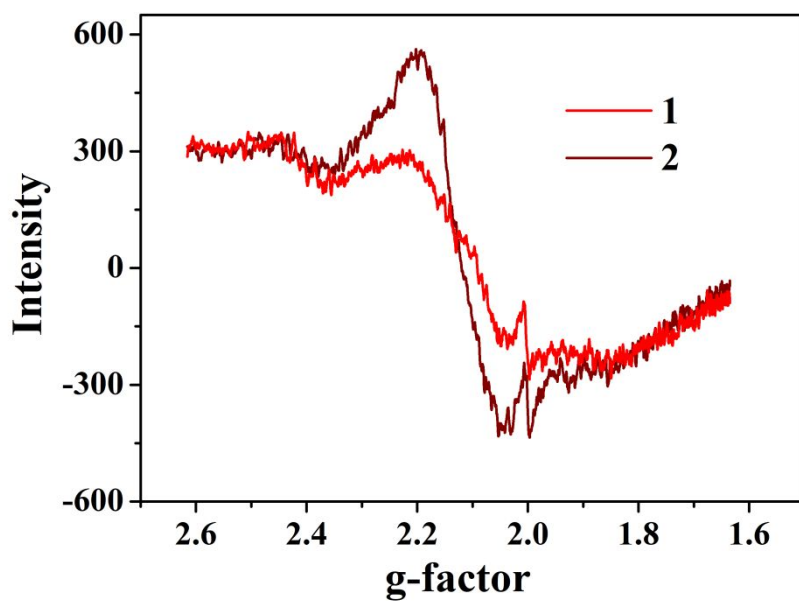

**Figure S9.** Solid-state ESR spectra of **1** and **2** recorded at 120 K.

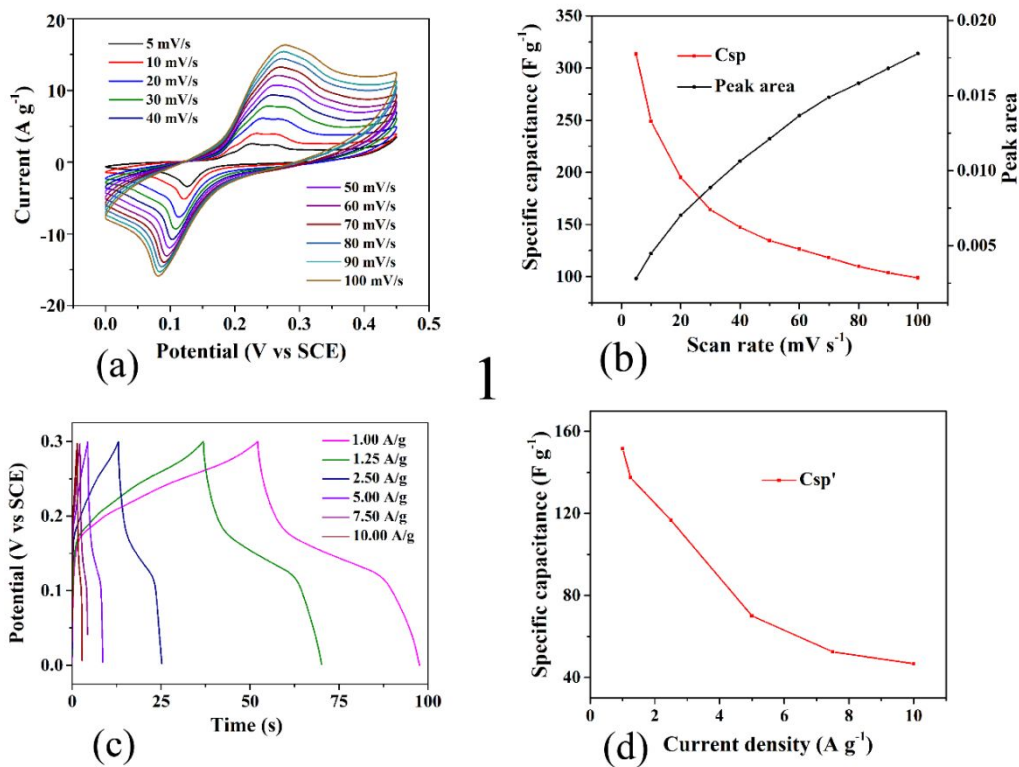

**Figure S10.** (a) CV curves of **1** at different scan rates. (b) The integrated area of the CV curves and the specific capacitances of **1** at different scan rates. (c) GCD curves of **1** at different current intensities. (d) Variation of specific capacitance of **1** with applied currents.

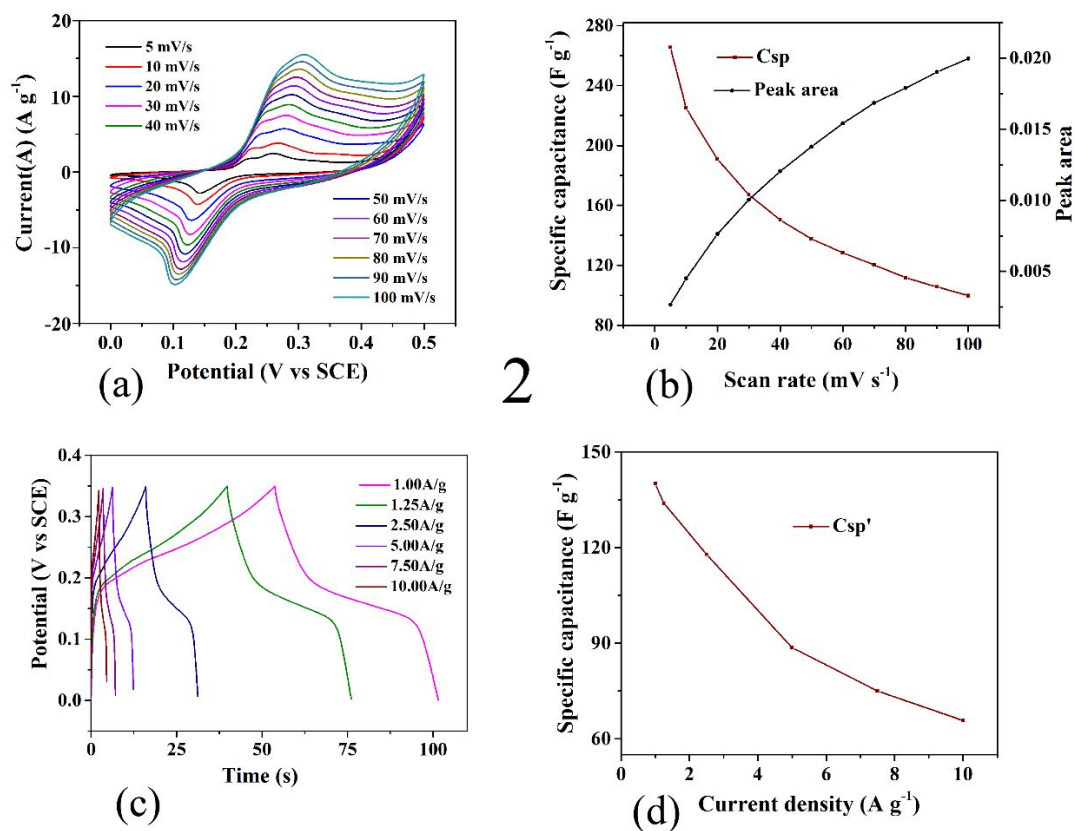

**Figure S11.** (a) CV curves of **2** at different scan rates. (b) The integrated area of the CV curves and the specific capacitances of **2** at different scan rates. (c) GCD curves of **2** at different current intensities. (d) Variation of specific capacitance of **2** with applied currents.

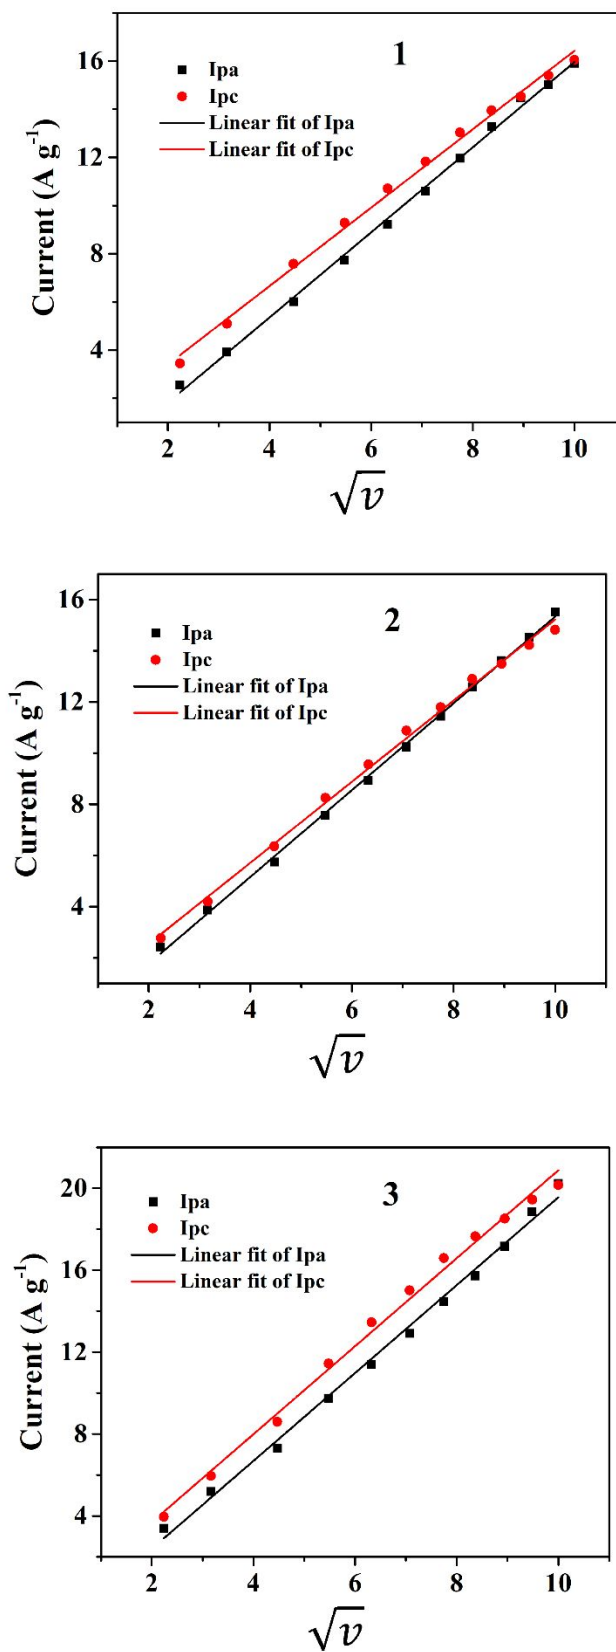

**Figure S12.** Curves of the peak currents vs the square roots of scan rates of **1**, **2**, and **3** for CV measurements.

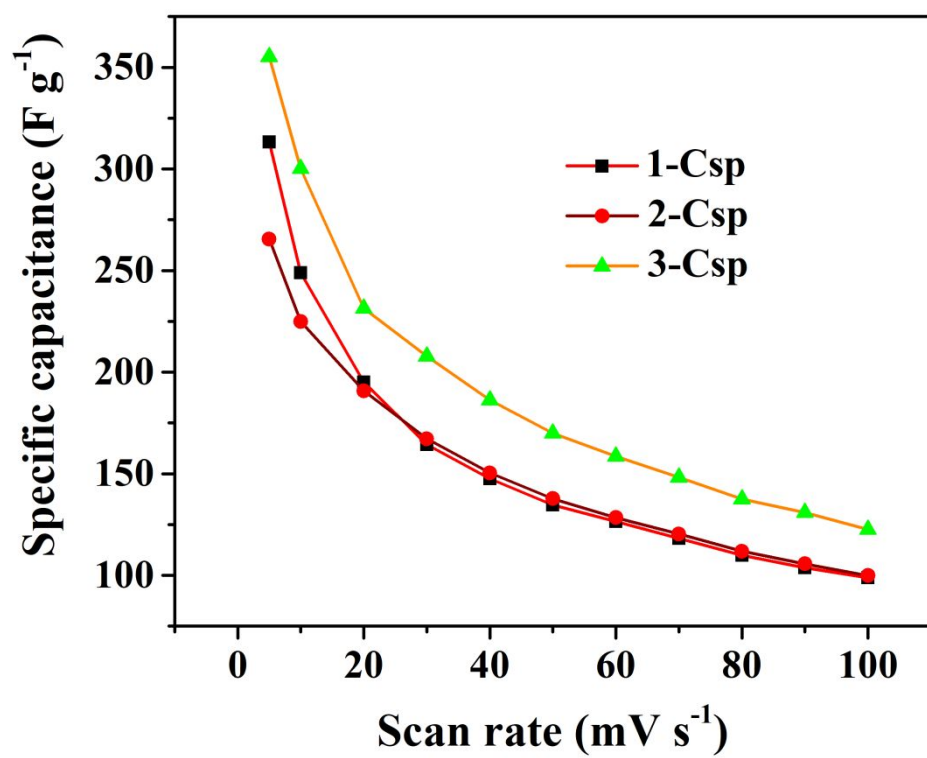

**Figure S13.** The specific capacitances of **1**, **2**, and **3** at different scan rates.

**Table S1.** The mean deviations (Å) from the plane of the TTF moiety and of bpe, the dihedral angles (°) and the distances (Å) between least-squares planes in **1** and **2**.

|          |    | mean deviation(Å) |       | dihedral<br>angle(°) | distance between<br>planes(Å) |      |
|----------|----|-------------------|-------|----------------------|-------------------------------|------|
| <b>1</b> | P1 | 0.0233(0.0057)    | P1^P2 | 0.667(131)           | P1–P2                         | 3.70 |
|          | P2 | 0.0701(0.0086)    | P3^P2 | 6.545(136)           | P3–P2                         | 3.94 |
|          | P3 | 0.0614(0.0064)    | P1^P3 | 7.212(62)            |                               |      |
|          | P4 | 0.0230(0.0066)    | P4^P5 | 0.575(205)           | P4–P5                         | 3.62 |
|          | P5 | 0.0148(0.0092)    | P6^P5 | 8.427(223)           | P6–P5                         | 3.58 |
|          | P6 | 0.0281(0.0076)    | P4^P6 | 7.959(77)            |                               |      |
|          | P7 | 0.0121(0.0066)    | P7^P8 | 5.623(151)           | P7–P8                         | 3.53 |
|          | P8 | 0.0193(0.0084)    | P9^P8 | 2.941(138)           | P9–P8                         | 3.56 |
|          | P9 | 0.0251(0.0066)    | P7^P9 | 7.953(69)            |                               |      |
| <b>2</b> | P1 | 0.0288(0.0100)    |       | 2.037(18)            |                               | 3.63 |
|          | P2 | 0.0452(0.0122)    |       |                      |                               |      |

**Table S2.** Comparison of Csp values of various Co-MOF materials.

| MOFs                                                                              | F g <sup>-1</sup> / mVs <sup>-1</sup> | F g <sup>-1</sup> / A g <sup>-1</sup> | F g <sup>-1</sup> /A g <sup>-1</sup> | Refs. |
|-----------------------------------------------------------------------------------|---------------------------------------|---------------------------------------|--------------------------------------|-------|
| [Co <sub>2</sub> (OH) <sub>2</sub> C <sub>8</sub> H <sub>4</sub> O <sub>4</sub> ] |                                       | 2564/1                                | 1165/20                              | 42    |
| Co8-MOF-5                                                                         | 3.27/25                               | 1.98/0.01                             |                                      | 43    |
| Co-BDC                                                                            | 131.8/10                              |                                       |                                      | 44    |
| Co-NDC                                                                            | 147.3/10                              |                                       |                                      | 44    |
| Co-BPDC                                                                           | 179.2/10                              |                                       |                                      | 44    |
| Co-LBDC                                                                           |                                       | 230.5/0.5                             |                                      | 45    |
| Co-LMOF                                                                           |                                       | 1786/1                                | 592/20                               | 46    |



**Table S3.** Crystal data and structural refinement parameters for compounds **1–3**.

|                                                             | <b>1</b>                                                                                          | <b>2</b>                                                                                       | <b>3</b>                                                                       |
|-------------------------------------------------------------|---------------------------------------------------------------------------------------------------|------------------------------------------------------------------------------------------------|--------------------------------------------------------------------------------|
| formula                                                     | C <sub>138</sub> H <sub>128</sub> Co <sub>6</sub> N <sub>12</sub> O <sub>34</sub> S <sub>36</sub> | C <sub>64</sub> H <sub>46</sub> Co <sub>5</sub> N <sub>4</sub> O <sub>18</sub> S <sub>24</sub> | C <sub>22</sub> H <sub>24</sub> CoN <sub>2</sub> O <sub>7</sub> S <sub>6</sub> |
| fw                                                          | 4006.5                                                                                            | 2223.3                                                                                         | 679.8                                                                          |
| cryst size (mm <sup>3</sup> )                               | 0.04×0.08×0.30                                                                                    | 0.13×0.15×0.55                                                                                 | 0.05×0.07×0.10                                                                 |
| cryst syst                                                  | monoclinic                                                                                        | triclinic                                                                                      | monoclinic                                                                     |
| space group                                                 | <i>P</i> 2 <sub>1</sub> / <i>c</i>                                                                | <i>P</i> $\bar{1}$                                                                             | <i>P</i> 2 <sub>1</sub> / <i>c</i>                                             |
| <i>a</i> (Å)                                                | 11.6564(13)                                                                                       | 7.4395(15)                                                                                     | 16.045(4)                                                                      |
| <i>b</i> (Å)                                                | 29.388(3)                                                                                         | 17.175(3)                                                                                      | 8.4992(17)                                                                     |
| <i>c</i> (Å)                                                | 47.199(6)                                                                                         | 17.822(4)                                                                                      | 25.844(5)                                                                      |
| $\alpha$ (deg)                                              | 90                                                                                                | 91.19(3)                                                                                       | 90                                                                             |
| $\beta$ (deg)                                               | 92.119(3)                                                                                         | 96.90(3)                                                                                       | 124.895(11)                                                                    |
| $\gamma$ (deg)                                              | 90                                                                                                | 93.44(3)                                                                                       | 90                                                                             |
| <i>V</i> (Å <sup>3</sup> )                                  | 16157(3)                                                                                          | 2255.7(8)                                                                                      | 2890.7(11)                                                                     |
| <i>Z</i>                                                    | 4                                                                                                 | 1                                                                                              | 4                                                                              |
| $\rho_{\text{calcd}}$ (g cm <sup>-3</sup> )                 | 1.639                                                                                             | 1.635                                                                                          | 1.553                                                                          |
| <i>F</i> (000)                                              | 8128                                                                                              | 1119                                                                                           | 1380                                                                           |
| $\mu$ (mm <sup>-1</sup> )                                   | 1.144                                                                                             | 1.518                                                                                          | 1.070                                                                          |
| <i>T</i> (K)                                                | 223(2)                                                                                            | 223(2)                                                                                         | 223(2)                                                                         |
| reflns collected                                            | 235249                                                                                            | 21662                                                                                          | 26583                                                                          |
| unique reflns                                               | 28236                                                                                             | 11127                                                                                          | 6609                                                                           |
| observed reflns                                             | 18826                                                                                             | 10137                                                                                          | 5551                                                                           |
| no. params                                                  | 2063                                                                                              | 6125                                                                                           | 353                                                                            |
| GOF on <i>F</i> <sup>2</sup>                                | 1.174                                                                                             | 1.018                                                                                          | 1.171                                                                          |
| <i>R</i> <sub>1</sub> [ <i>I</i> >2 $\sigma$ ( <i>I</i> )]  | 0.0929                                                                                            | 0.0982                                                                                         | 0.0794                                                                         |
| <i>wR</i> <sub>2</sub> [ <i>I</i> >2 $\sigma$ ( <i>I</i> )] | 0.1744                                                                                            | 0.1596                                                                                         | 0.1771                                                                         |

#### 4. Equations

$$C_{sp} = \frac{\int_{V_0}^V I(V) dV}{mv(V - V_0)} \quad (1)^1$$

where  $C_{sp}$  ( $F\ g^{-1}$ ),  $m$  (g),  $v$  ( $V\ s^{-1}$ ),  $(V-V_0)$ , and  $I(V)$  are the specific capacitance, mass of the active material, potential scan rate, potential range and current density, respectively.

$$C'_{sp} = \frac{I \times \Delta t}{\Delta V \times m} \quad (2)^1$$

where  $C_{sp}'$  ( $F\ g^{-1}$ ) is the discharge specific capacitance,  $I$  is the discharge current (A),  $\Delta t$  is the discharge time (s),  $\Delta V$  is the potential window, and  $m$  is the mass (g) of the active material.

#### References

1. Lu, M.; Yuan, X.-P.; Guana, X.-H.; Wang, G.-S. Synthesis of nickel chalcogenide hollow spheres using an L-cysteine-assisted hydrothermal process for efficient supercapacitor electrodes. *J. Mater. Chem. A* **2017**, *5*, 3621–3627.
